# Supplementary material
Source: PubMed Central journal article supplement (PMC2694443)

## A

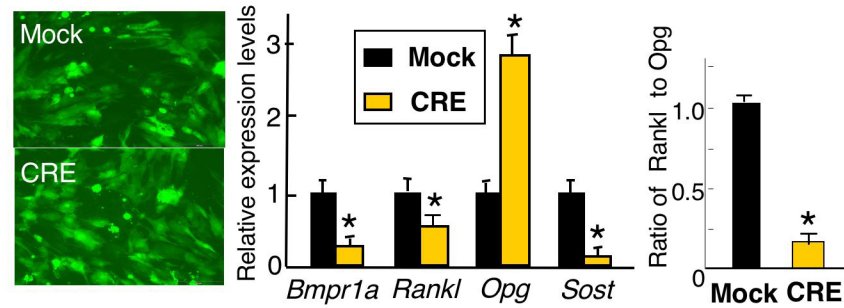

## B

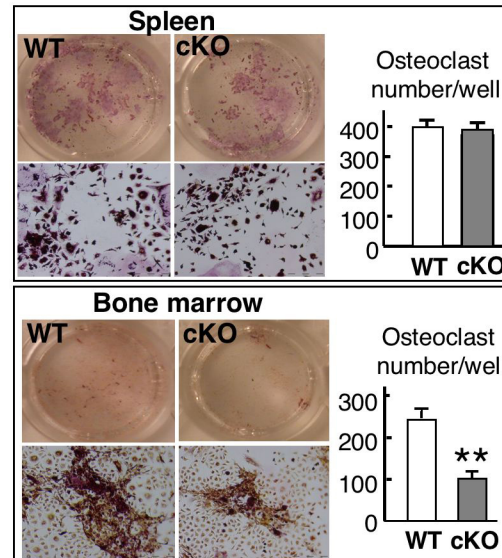

## C

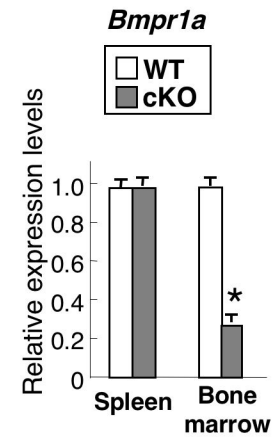

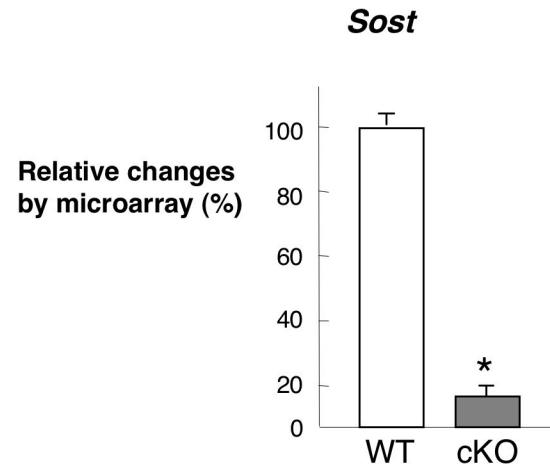

**A**

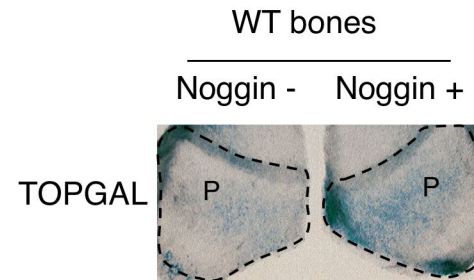

**B**

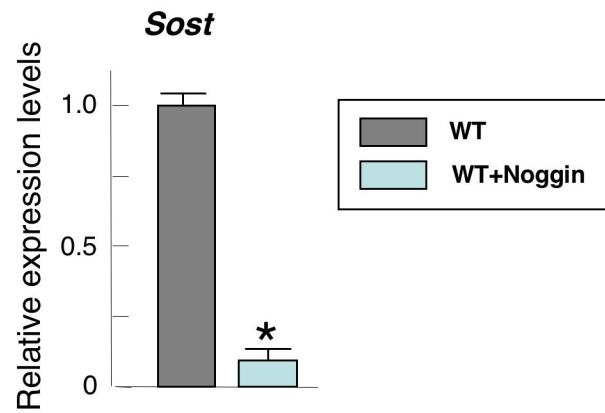

**A**

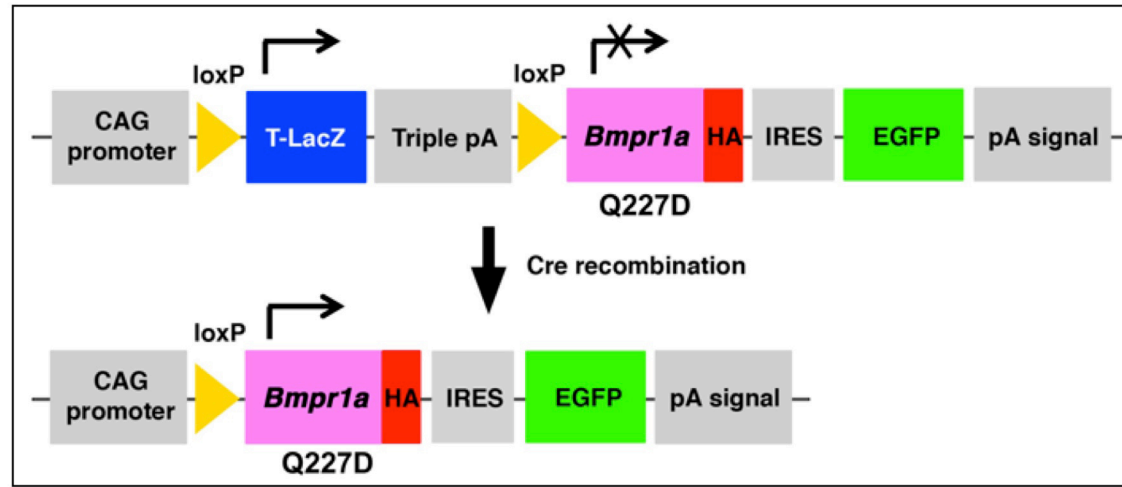

**B**

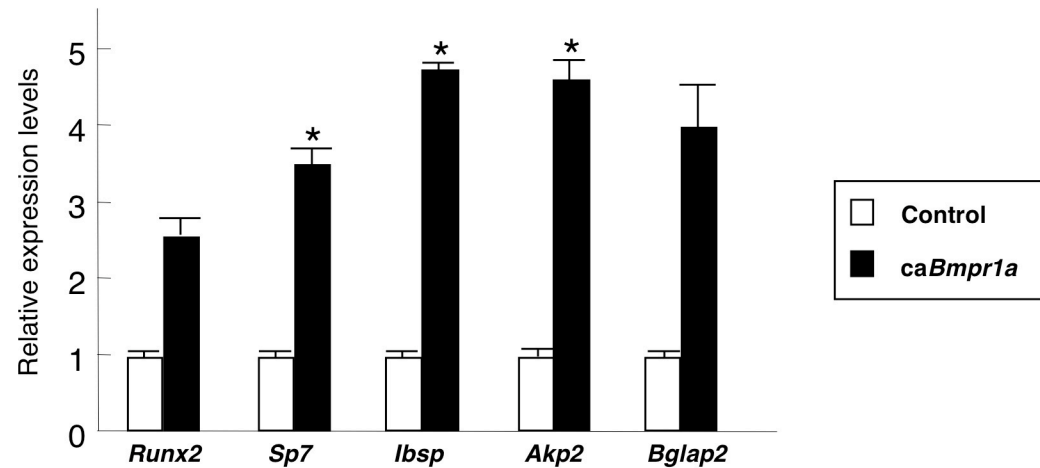

Supplement: NIHMS114616-supplement-supple_fig_1-4.pdf [file NIHMS114616-supplement-supple_fig_1-4.pdf]
